# Supplementary material for: A quantitative ionicity scale for liquid chloride salts
Source: Royal Society of Chemistry journal article supplement (doi:10.1039/c2cp41754e), 2012-01-01
Supplement: c2cp41754e.pdf [file c2cp41754e.pdf]

## A quantitative ionicity scale for liquid chloride salts

**Authors:** Petri Ingman<sup>a</sup>, Gordon W. Driver<sup>\*b</sup>

**Affiliations:**

<sup>a</sup>Instrument Centre/Department of Chemistry, University of Turku, FIN-20014, Turku, Finland.

<sup>b</sup>Department of Chemistry, Chemical-Biological Center, Umeå University, SE-90187 Umeå, Sweden.

Contact details: [gordon.driver@chem.umu.se](mailto:gordon.driver@chem.umu.se) and [petri.ingman@utu.fi](mailto:petri.ingman@utu.fi)

**Supporting information:**

Table of Contents:

|                                                             |     |
|-------------------------------------------------------------|-----|
| 1. Materials.....                                           | (2) |
| 2. Methods.....                                             | (2) |
| 2.1 Experimental.....                                       | (2) |
| 2.2 Calculations.....                                       | (5) |
| 2.2.1 Correlation times and $ C_Q (^{35}\text{Cl}^-)$ ..... | (5) |
| 2.2.2 Anisotropic rotational diffusion coefficients.....    | (6) |
| 2.2.3 Friction coefficients.....                            | (6) |
| 2.2.4 Diffusion coefficients.....                           | (6) |
| 3. References.....                                          | (6) |

## **1. Materials:**

[Hmim]Cl was synthesized according to a modified literature procedure, such that the 1:1 salt was obtained.<sup>1</sup>

## **2. Methods:**

### **2.1 Experimental:**

<sup>35</sup>Cl relaxation experiments performed with [Hmim]Cl were carried out with Bruker AVANCE 600 MHz ( $B_0 = 14.1$  T) and 500 MHz ( $B_0 = 11.7$  T) NMR spectrometers using Bruker's standard 5 mm Z-gradient BBO probe. The operating frequencies for <sup>35</sup>Cl were 58.80 and 49.00 MHz, respectively, and for <sup>13</sup>C 150.90 MHz and 125.76 MHz. <sup>1</sup>H DOSY measurements were carried out with Bruker AVANCE 400 MHz ( $B_0 = 9.4$  T) with similar 5 mm Z-gradient BBO probe. The resonance frequency for proton was 399.75 MHz.

The spin-lattice relaxation time,  $T_1$ , was measured by the inversion recovery pulse sequence ( $180^\circ - \tau - 90^\circ - \text{RD}$ ) with relaxation delay  $\text{RD} > 10T_1$ . <sup>13</sup>C relaxation measurements were made under inverse gated Waltz decoupling.  $90^\circ$  pulses for both nuclei were equal or less than 10  $\mu\text{s}$ . Sixteen  $\tau$  values were used to acquire <sup>35</sup>Cl relaxation data. Number of scans varied from high temperature 400 scans to 20,000 near  $T_1$  minimum where the broadening of the <sup>35</sup>Cl signal made observations more demanding. The total experiment time for one relaxation measurement was few minutes at high temperatures and 1.7 h at low ones. Twenty two  $\tau$  values and 32 scans were used to acquire the <sup>13</sup>C data. Sixteen dummy scans were used to compensate the possible warming of the sample due to the decoupling. The total experiment time for one relaxation measurement of <sup>13</sup>C was 3.5 h.  $T_1$  relaxation experiments of <sup>13</sup>C were measured in triplicate as were  $T_1$  experiments of <sup>35</sup>Cl, at fixed

temperatures. However,  $T_1$  of  $^{35}\text{Cl}$  for the temperature dependence plot was measured only once at every temperature.

Data was processed using area-fit in Bruker's  $T_1$  module of the Xwinnmr or TopSpin program. There was no evidence of non-exponential recovery in either case. We estimate the error for experimental  $T_1$  of  $^{13}\text{C}$  to be better than 10%. Due the very short  $T_1$  and broad peak of  $^{35}\text{Cl}$ , the errors increased when  $T_1 < 0.1$  ms and, therefore, the maximum error for  $^{35}\text{Cl}$  experimental data is 10-15 % over the whole temperature range.

The Arrhenius type equation,  $T_1 = T_{10} \exp^{\frac{E_a}{RT}}$ , was fitted to high temperature points of the  $\ln(T_1)$  vs.  $1000/T$  plot, where T is the temperature, as given in Figure 1 below. The line on the low temperature points is drawn using the same fitted equation with the negative slope,

$$\frac{-E_a}{R}.$$

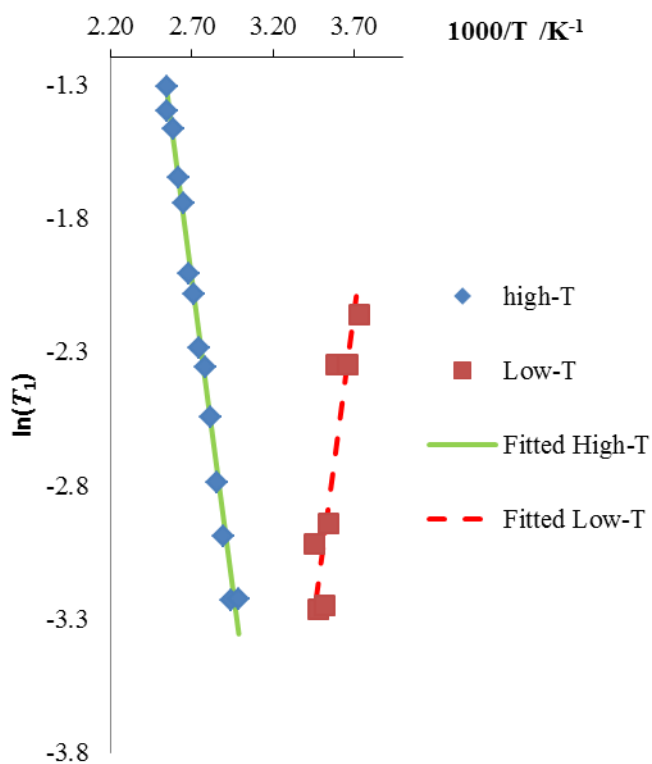

**Figure 1.** Arrhenius plot of <sup>35</sup>Cl variable temperature  $T_1$  data.

The spin-spin relaxation time,  $T_2$ , was determined from half-height of the line width. Because of the broad <sup>35</sup>Cl lines, we assumed the inhomogeneity of the magnetic field have not much effect on the line width. Therefore,  $T_2 = 1/(\pi\Delta\nu_{1/2})$  where  $\Delta\nu_{1/2}$  is the line width at the half-height of the peak.<sup>2</sup>

2D-DOSY measurements were made with the stimulated echo pulse program with bipolar gradient pulses and a longitudinal eddy current delay (ledbpgp2s from Bruker pulse sequence library). The 90°-pulse for proton was 8.1  $\mu$ s and we used 12 ms sine shaped gradients. The FIDs were collected into 32k data points leading to 2.5 s acquisition time. The relaxation delay was also 2.5 s. The diffusion time was 200 ms. The gradient strength was increased from 5% to 95% of the maximum strength of 53.5 G cm<sup>-1</sup> in 64 steps with signal average of 4 scans for every step. The total experiment time was about 22 minutes.

FIDs were apodized with exponential multiplication (LB = 1) and zero filled before Fourier transform. Diffusion coefficients and DOSY displays were obtained using Bruker's DOSY module of the Xwinnmr or TopSpin program.

Temperature was controlled by a Bruker BVT-3000 temperature unit. The correct temperature was set with a Bruker standard calibration samples of 80% glycol in [D6]DMSO and 4% of methanol in methanol-D<sub>4</sub>. The temperature was let to stabilize an hour before the measurement. The accuracy of the sample temperature has been estimated to be 1°.

## 2.2 Calculations:

### 2.2.1 Correlation times and $|C_Q|(^{35}\text{Cl})$ :

$|C_Q|(^{35}\text{Cl})$  values were determined by first solving the  $T_1$  relation (Equation 1) over two magnetic fields (11.7 T, and 14.1 T), at the specified temperatures, for the corresponding correlation time,  $\tau_Q$ . We employed the following relation shown in Equation 1,

$$\frac{R_{1,500}}{R_{1,600}} = \frac{8UU^2 + VV^4(32UU^2 + 20) + VV^2(40UU^2 + 25) + 5}{25UU^2 + 20UU^4 + VV^2(32UU^4 + 40UU^2 + 8) + 5} \quad (1)$$

**Equation 1.** Rate equation used to solve for  $|C_Q|(^{35}\text{Cl})$  at various temperatures.

We used values of  $R_{1,n} = \frac{1}{T_{1,n}}$  (for  $T_1$  at  $n = 500$  MHz, 600 MHz), and substituted  $UU = \omega_{500}\tau_Q$

and  $VV = \omega_{600}\tau_Q$ , to obtain  $\tau_Q$ . Once the correlation time was found at each temperature,

$|C_Q|(^{35}\text{Cl})$  was easily obtained. Where  $T_2$  values were used in conjunction with  $T_1$  values, we followed a procedure reported in reference 3.

2.2.2 Anisotropic rotational diffusion coefficients for [Hmim]<sup>+</sup> in Table 2 of the main text were obtained using a method described in reference 4.

2.2.3 Friction coefficients in Table 2 of the main text were calculated according to equations given in reference 5 using parameters given in Table 1.

**Table 1.** Parameters required for calculation of friction coefficients.

| IL                     | T / K | $V_m / \text{dm}^3 \text{mol}^{-1}$ | Reference | $\sigma / \text{mS cm}^{-1}$ | Reference |
|------------------------|-------|-------------------------------------|-----------|------------------------------|-----------|
| [Hmim]Cl               | 373   | 0.103                               | this work | 4.146                        | this work |
| [C <sub>2</sub> mim]Cl | 377   | 0.134 <sup>a</sup>                  | 6-8       | 31.88                        | 9         |

<sup>a</sup> Calculated from densities reported in given references, extrapolated to 377 K. T is the temperature,  $V_m$  is the molar volume and  $\sigma$  is the specific conductivity.

The density of [Hmim]Cl was determined using a 2.00 mL volumetric flask, calibrated with distilled water. Samples were added to the mark and weighed using an analytical balance, in triplicate, over three temperatures, in the range 298.25- 346.65 K. The value at 373 K was obtained by extrapolation. The specific conductivity of [Hmim]Cl was obtained from variable temperature microwave dielectric relaxation spectroscopy (DRS) measurements, described in reference 10 over the temperature range 303 - 353 K, with extrapolation to 373 K.

2.2.4 Diffusion coefficients were obtained for Cl<sup>-</sup> in this work according to  $D_{\text{rot.}} = \frac{1}{6\tau_Q}$

(rotational) and  $D_{\text{trans.}} = \frac{2a_{\text{Cl}}^2}{9\tau_Q}$  (translational),<sup>11</sup> with  $a_{\text{Cl}} = 1.81 \times 10^{-8}$  cm.

### 3. References:

1. G. Driver and K. E. Johnson, *Green Chem.*, 2003, **5**, 163-169.
2. J. D. Decatur and T. C. Farrar, *J. Phys. Chem.*, 1990, **94**, 7391-7394.
3. C. E. Keller, B. J. Piersma, G. J. Mains and W. R. Carper, *Inorg. Chem.*, 1994, **33**, 5601-5603.
4. G. W. Driver and P. Ingman, *ChemPhysChem*, 2011, **12**, 757-760.
5. C. T. Moynihan, in *Ionic Interactions: From Dilute Solutions to Fused Salts*, ed. S. Petrucci, Academic, New York, 1971, vol. 1, pp. 261-238.
6. T. Chen, M. Chidambaram, Z. Liu, B. Smit and A. T. Bell, *J. Phys. Chem. B*, 2010, **114**, 5790-5794.
7. G.-C. Tian, D. Wang and Y.-D. Li, *Adv. Mat. Res.*, 2012, **457-458**, 249-252.
8. G. Raabe and J. Kohler, *J. Chem. Phys.*, 2008, **128**, 154509-154507.

9. J. Vila, L. M. Varela and O. Cabeza, *Electrochim. Acta*, 2007, **52**, 7413-7417.
10. M.-M. Huang, Y. Jiang, P. Sasisanker, G. W. Driver and H. Weingärtner, *J. Chem. Eng. Data*, 2011, 1494-1499.
11. A. Abragam, *The Principles of Nuclear Magnetism*, Oxford University Press, London, 1961.
